# Supplementary material for: Application of Lipidomics in Psychiatry: Plasma-Based Potential Biomarkers in Schizophrenia and Bipolar Disorder
Source: MDPI journal article supplement (doi:10.3390/metabo13050600), 2023-04-27
Supplement: s1 [file s1]

## Supplementary Material

# Application of Lipidomics in Psychiatry: Plasma-Based Potential Biomarkers in Schizophrenia and Bipolar Disorder

Alana C. Costa <sup>1,2,†</sup>, Larissa B. Riça <sup>3,†</sup>, Martinus van de Bilt <sup>1,2</sup>, Flávia S. Zandonadi <sup>3</sup>, Wagner F. Gattaz <sup>1,2</sup>, Leda L. Talib <sup>1,2,†</sup> and Alessandra Sussulini <sup>3,4,\*</sup>

<sup>1</sup> Laboratory of Neuroscience (LIM-27), Department and Institute of Psychiatry, University of Sao Paulo Medical School, Sao Paulo 0540390,, Brazil; alanacosta@usp.br (A.C.C.); martinus.bilt@gmail.com (M.v.d.B.); gattaz@usp.br (W.F.G.); ledatalib@usp.br (L.L.T.)

<sup>2</sup> Instituto Nacional de Biomarcadores em Neuropsiquiatria (INBioN), Conselho Nacional de Desenvolvimento Científico e Tecnológico, Sao Paulo 05403903, Brazil

<sup>3</sup> Laboratory of Bioanalytics and Integrated Omics (LaBIOmics), Institute of Chemistry, University of Campinas (UNICAMP), Campinas 13083970, Brazil; l262803@dac.unicamp.br (L.B.R.); flazando@unicamp.br (F.S.Z.)

<sup>4</sup> Instituto Nacional de Ciência e Tecnologia de Bioanalítica (INCTBio), Institute of Chemistry, University of Campinas (UNICAMP), Campinas 13083970, Brazil

\* Correspondence: sussulini@unicamp.br; Tel.: +55-19-3521-3060

† These authors contributed equally to this work.

**Figure S1.** Data distribution before and after normalization for variables (top, referred as features) and samples (bottom) regarding the BD×CT comparison.

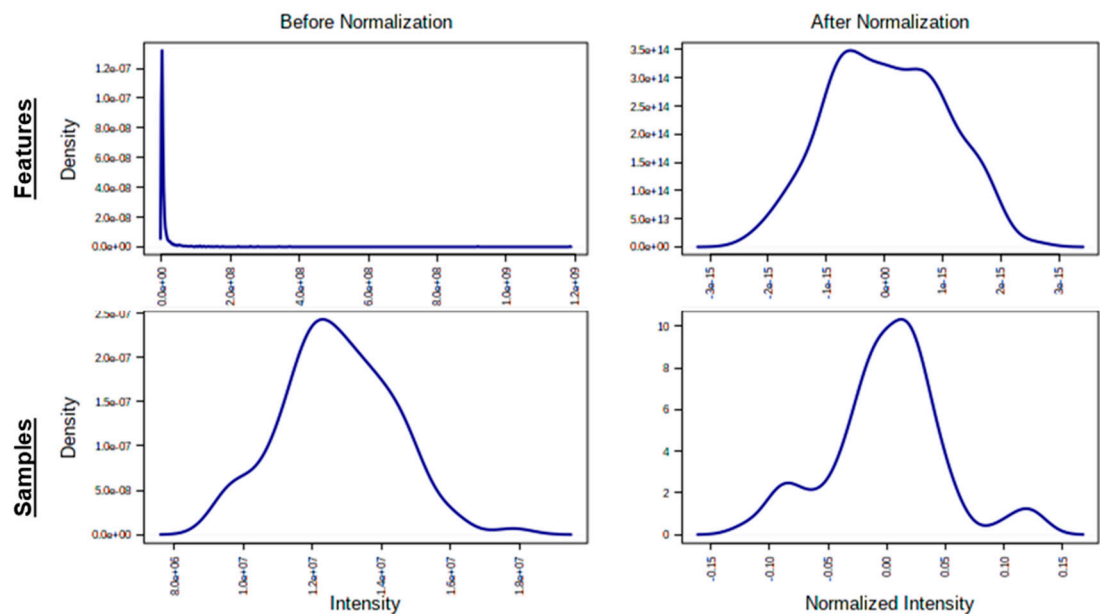

**Figure S2.** Data distribution before and after normalization for variables (top, referred as features) and samples (bottom) regarding the SZ×CT comparison.

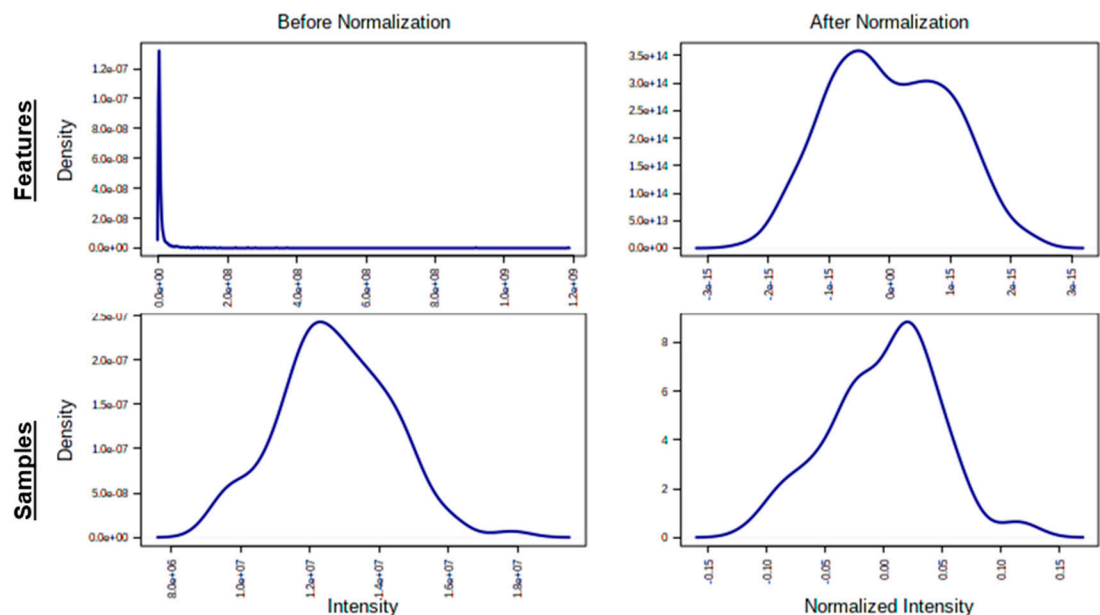

**Figure S3.** Data distribution before and after normalization for variables (top, referred as features) and samples (bottom) regarding the BD×SZ comparison.

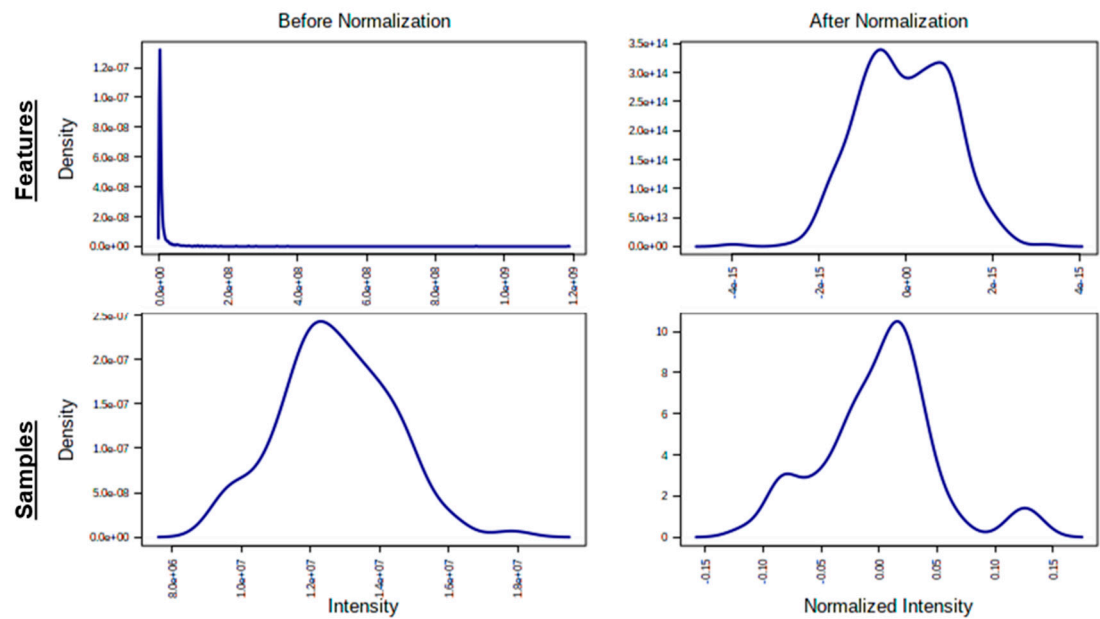

**Table S1.** List of significant features identified by the Wilcoxon test between SZ×CT, from lowest to highest *p*-value

| <b>Feature</b> | <b><i>p</i>-value</b> |
|----------------|-----------------------|
| 621.3399       | $4.06 \times 10^{-5}$ |
| 904.6418       | $5.05 \times 10^{-5}$ |
| 899.6509       | $5.83 \times 10^{-5}$ |
| 620.3373       | $7.22 \times 10^{-5}$ |
| 873.7088       | $7.22 \times 10^{-5}$ |
| 903.6377       | $8.30 \times 10^{-5}$ |
| 785.6548       | $9.53 \times 10^{-5}$ |
| 846.6819       | $1.25 \times 10^{-4}$ |
| 875.7151       | $1.43 \times 10^{-4}$ |
| 845.6788       | $1.64 \times 10^{-4}$ |
| 900.6545       | $1.75 \times 10^{-4}$ |
| 207.9167       | $1.87 \times 10^{-4}$ |
| 874.7135       | $1.87 \times 10^{-4}$ |
| 833.6697       | $2.27 \times 10^{-4}$ |
| 832.6672       | $2.42 \times 10^{-4}$ |
| 673.5293       | $5.11 \times 10^{-4}$ |
| 736.6858       | $5.11 \times 10^{-4}$ |
| 831.6636       | $5.43 \times 10^{-4}$ |
| 913.6670       | $5.43 \times 10^{-4}$ |
| 101.5198       | $7.30 \times 10^{-4}$ |
| 659.5131       | $7.74 \times 10^{-4}$ |
| 914.6698       | $7.74 \times 10^{-4}$ |
| 727.6554       | $8.20 \times 10^{-4}$ |
| 733.5537       | $8.20 \times 10^{-4}$ |
| 720.5408       | $9.75 \times 10^{-4}$ |
| 719.5374       | $1.03 \times 10^{-3}$ |
| 731.5375       | $1.03 \times 10^{-3}$ |
| 721.5444       | $1.16 \times 10^{-3}$ |
| 539.3208       | $1.29 \times 10^{-3}$ |
| 734.5572       | $1.37 \times 10^{-3}$ |
| 538.3174       | $2.22 \times 10^{-3}$ |
| 567.3524       | $2.47 \times 10^{-3}$ |
| 788.5286       | $2.60 \times 10^{-3}$ |
| 867.6409       | $2.74 \times 10^{-3}$ |
| 1103.6560      | $2.74 \times 10^{-3}$ |
| 1104.6600      | $3.72 \times 10^{-3}$ |
| 889.6218       | $4.31 \times 10^{-3}$ |
| 566.3490       | $4.53 \times 10^{-3}$ |
| 1035.6680      | $4.53 \times 10^{-3}$ |
| 1036.6720      | $4.53 \times 10^{-3}$ |
| 1037.6760      | $4.53 \times 10^{-3}$ |
| 542.3393       | $4.76 \times 10^{-3}$ |
| 614.3486       | $4.76 \times 10^{-3}$ |
| 930.6524       | $4.99 \times 10^{-3}$ |
| 481.3145       | $5.24 \times 10^{-3}$ |
| 541.3365       | $5.24 \times 10^{-3}$ |
| 480.3114       | $5.50 \times 10^{-3}$ |
| 100.0728       | $6.34 \times 10^{-3}$ |
| 543.3421       | $6.34 \times 10^{-3}$ |

**Table S2.** List of significant features identified by the Wilcoxon test between BD×SZ, from lowest to highest *p*-value

| <b>Feature</b> | <b><i>p</i>-value</b> |
|----------------|-----------------------|
| 862.6984       | $1.99 \times 10^{-4}$ |
| 832.6672       | $2.93 \times 10^{-4}$ |
| 873.7088       | $2.93 \times 10^{-4}$ |
| 833.6697       | $3.54 \times 10^{-4}$ |
| 984.6292       | $3.76 \times 10^{-4}$ |
| 785.6548       | $4.26 \times 10^{-4}$ |
| 207.9167       | $4.53 \times 10^{-4}$ |
| 831.6636       | $4.53 \times 10^{-4}$ |
| 799.6701       | $5.11 \times 10^{-4}$ |
| 800.6729       | $6.49 \times 10^{-4}$ |
| 845.6788       | $6.49 \times 10^{-4}$ |
| 214.9244       | $7.30 \times 10^{-4}$ |
| 846.6819       | $7.30 \times 10^{-4}$ |
| 860.6979       | $8.69 \times 10^{-4}$ |
| 932.6232       | $8.69 \times 10^{-4}$ |
| 861.7015       | $9.21 \times 10^{-4}$ |
| 859.6946       | $9.75 \times 10^{-4}$ |
| 874.7135       | $9.75 \times 10^{-4}$ |
| 612.5961       | $1.44 \times 10^{-3}$ |
| 875.7151       | $1.44 \times 10^{-3}$ |
| 985.6209       | $1.44 \times 10^{-3}$ |
| 640.6277       | $1.70 \times 10^{-3}$ |
| 913.6670       | $2.74 \times 10^{-3}$ |
| 473.4018       | $2.88 \times 10^{-3}$ |
| 101.5198       | $3.19 \times 10^{-3}$ |
| 914.6698       | $3.19 \times 10^{-3}$ |
| 876.6858       | $3.26 \times 10^{-3}$ |
| 928.6860       | $3.53 \times 10^{-3}$ |

**Tables S3 to S5.** Available as .xls file.

**Table S6.** Mass spectrometry characterization with theoretical (Th) and experimental (Exp) masses with the  $m/z$  and putative identification for the significant features of the BD×CT comparison

| Lipid Class | Putative identification | ID Level <sup>†</sup> | Adduct                                  | Mass Error (ppm) | $m/z$ Exp | $m/z$ Th |
|-------------|-------------------------|-----------------------|-----------------------------------------|------------------|-----------|----------|
| —           | <i>nf</i>               | 4                     | —                                       | —                | 101.5198  | —        |
| FA          | Caproic acid            | 2                     | [M-H] <sup>-</sup>                      | 6                | 115.0758  | 116.0837 |
| —           | <i>nf</i>               | 4                     | —                                       | —                | 138.9330  | —        |
| —           | <i>nf</i>               | 4                     | —                                       | —                | 214.4207  | —        |
| —           | <i>nf</i>               | 4                     | —                                       | —                | 214.9244  | —        |
| —           | <i>nf</i>               | 4                     | —                                       | —                | 237.8966  | —        |
| —           | <i>nf</i>               | 4                     | —                                       | —                | 246.9052  | —        |
| —           | <i>nf</i>               | 4                     | —                                       | —                | 249.9791  | —        |
| —           | <i>nf</i>               | 4                     | —                                       | —                | 262.0156  | —        |
| FA          | FA 18:0;O2              | 2                     | [M-H] <sup>-</sup>                      | 4                | 315.2553  | 316.2614 |
| —           | <i>nf</i>               | 4                     | —                                       | —                | 367.9082  | —        |
| —           | <i>nf</i>               | 4                     | —                                       | —                | 371.9026  | —        |
| —           | <i>nf</i>               | 4                     | —                                       | —                | 396.8927  | —        |
| —           | <i>nf</i>               | 4                     | —                                       | —                | 433.8786  | —        |
| —           | <i>nf</i>               | 4                     | —                                       | —                | 435.8956  | —        |
| —           | <i>nf</i>               | 4                     | —                                       | —                | 439.8901  | —        |
| GP          | LPE 16:0                | 2                     | [M-H] <sup>-</sup>                      | 5                | 452.2804  | 453.2855 |
| ST          | ST 24:1;O5              | 2                     | [M+HCOOH-H] <sup>-</sup>                | 4                | 453.2841  | 408.2876 |
| ST          | ST 29:1;O               | 2                     | [M+CH <sub>3</sub> COOH-H] <sup>-</sup> | 4                | 473.4018  | 428.4018 |
| GP          | LPE 18:1                | 2                     | [M-H] <sup>-</sup>                      | 4                | 478.2959  | 479.3012 |
| ST          | ST 25:2;O5              | 2                     | [M+CH <sub>3</sub> COOH-H] <sup>-</sup> | 5                | 479.2993  | 420.2876 |
| GP          | LPE 18:0                | 2                     | [M-H] <sup>-</sup>                      | 4                | 480.3114  | 481.3168 |
| ST          | ST 26:1;O5              | 2                     | [M+HCOOH-H] <sup>-</sup>                | 6                | 481.3145  | 436.3189 |

|    |                                  |   |                                     |    |          |           |
|----|----------------------------------|---|-------------------------------------|----|----------|-----------|
| GP | LPE 20:4                         | 2 | [M-H] <sup>-</sup>                  | 5  | 500.2807 | 501.2855  |
| ST | ST 29:4;O8                       | 2 | [M-H-H <sub>2</sub> O] <sup>-</sup> | 2  | 501.2839 | 520.3036  |
| —  | <i>nf</i>                        | 4 | —                                   | —  | 507.8775 | —         |
| ST | VIT D3 deriv <sup>‡</sup>        | 2 | [M+K-2H] <sup>-</sup>               | 9  | 527.3191 | 490.3658  |
| —  | <i>nf</i>                        | 4 | —                                   | —  | 527.8726 | —         |
| GP | LPS 19:0                         | 2 | [M-H] <sup>-</sup>                  | 4  | 538.3174 | 539.3223  |
| ST | ST 18:4;O2                       | 2 | [2M-H] <sup>-</sup>                 | 8  | 539.3208 | 270.1620  |
| GP | PC 16:0                          | 2 | [M+HCOOH-H] <sup>-</sup>            | 6  | 540.3337 | 495.3325  |
| GP | LPC 16:0                         | 2 | [M+HCOOH-H] <sup>-</sup>            | 3  | 541.3365 | 496.3398  |
| GP | LPC O-18:1                       | 2 | [M+Cl] <sup>-</sup>                 | 2  | 542.3393 | 507.3689  |
| GP | LPA 24:0                         | 2 | [M+Na-2H] <sup>-</sup>              | 2  | 543.3421 | 522.3685  |
| GP | LPC 18:3                         | 2 | [M+HCOOH-H] <sup>-</sup>            | 5  | 562.3176 | 517.3168  |
| GP | LPC 16:0                         | 2 | [M-H+HCOONa] <sup>-</sup>           | 1  | 563.3211 | 496.3403  |
| GP | LPS 21:0                         | 2 | [M-H] <sup>-</sup>                  | 5  | 566.3490 | 567.3536  |
| GP | LPC 18:1                         | 2 | [M+HCOOH-H] <sup>-</sup>            | 3  | 567.3524 | 522.3560  |
| GP | LPS O-20:0                       | 2 | [M+K-2H] <sup>-</sup>               | 5  | 576.3098 | 539.3587  |
| —  | <i>nf</i>                        | 4 | —                                   | —  | 585.5682 | —         |
| GP | PHOOA-PE                         | 2 | [M-H-H <sub>2</sub> O] <sup>-</sup> | 5  | 588.3334 | 607.3485  |
| GP | LPC 18:1                         | 2 | [M-H+HCOONa] <sup>-</sup>           | 1  | 589.3366 | 522.3560  |
| GP | PA 30:3                          | 2 | [M-H-H <sub>2</sub> O] <sup>-</sup> | 11 | 595.3833 | 614.3948  |
| GP | PHHdiA-PE                        | 2 | [M-H] <sup>-</sup>                  | 2  | 608.3217 | 609.3278  |
| —  | <i>nf</i>                        | 4 | —                                   | —  | 609.3243 | —         |
| SP | Monosialyl-Gb5                   | 2 | [M-3H] <sup>3-</sup>                | 16 | 610.3273 | 1834.0340 |
| SP | Cer 42:2;O                       | 2 | [M-H-H <sub>2</sub> O] <sup>-</sup> | 19 | 612.5961 | 631.6267  |
| —  | <i>nf</i>                        | 4 | —                                   | —  | 613.5998 | —         |
| SP | Hex(5)-HexNAc(2)-Cer 42:2;O2     | 2 | [M-3H] <sup>3-</sup>                | 6  | 620.3373 | 1864.0445 |
| SP | Hex(3)-HexNAc-KDN(2)-Cer 44:1;O2 | 2 | [M-3H] <sup>3-</sup>                | 1  | 621.3399 | 1867.0442 |
| FA | LTC4                             | 2 | [M-H] <sup>-</sup>                  | 0  | 624.2958 | 625.3033  |
| SP | Cer 44:2;O                       | 2 | [M-H-H <sub>2</sub> O] <sup>-</sup> | 18 | 640.6277 | 659.6580  |
| —  | <i>nf</i>                        | 4 | —                                   | —  | 641.6310 | —         |

|    |                       |   |                                         |    |          |          |
|----|-----------------------|---|-----------------------------------------|----|----------|----------|
| —  | <i>nf</i>             | 4 | —                                       | —  | 643.8533 | —        |
| ST | CE 16:1               | 2 | [M+K-2H] <sup>-</sup>                   | 7  | 659.5131 | 622.5689 |
| SP | Cer 42:1;O            | 2 | [M+Cl] <sup>-</sup>                     | 10 | 668.6052 | 633.6424 |
| SP | SM 32:1;O2            | 2 | [M-H] <sup>-</sup>                      | 1  | 673.5293 | 674.5363 |
| SP | Cer 38:2;O3           | 2 | [M-H+HCOONa] <sup>-</sup>               | 1  | 674.5338 | 607.5540 |
| GP | LPI 20:5              | 2 | [M-H+HCOONa] <sup>-</sup>               | 7  | 685.2566 | 618.2805 |
| ST | Glucoronide           | 2 | [M+Cl] <sup>-</sup>                     | 7  | 686.2630 | 651.2891 |
| SP | Cer 42:0;O3           | 2 | [M+Na-2H] <sup>-</sup>                  | 9  | 688.6286 | 667.6479 |
| —  | <i>nf</i>             | 4 | —                                       | —  | 697.8190 | —        |
| GP | PA O-40:4             | 2 | [M-H-H <sub>2</sub> O] <sup>-</sup>     | 1  | 719.5374 | 738.5563 |
| SP | HexCer 34:1;O2        | 2 | [M+Na-2H] <sup>-</sup>                  | 2  | 720.5408 | 699.5649 |
| SP | SM 32:0;O2            | 2 | [M+HCOOH-H] <sup>-</sup>                | 8  | 721.5444 | 331.2643 |
| SP | Cer 42:0;O3           | 2 | [M+CH <sub>3</sub> COOH-H] <sup>-</sup> | 6  | 726.6579 | 667.6479 |
| FA | FAHFA 24:3-(2-O-24:0) | 2 | [M-H] <sup>-</sup>                      | 8  | 727.6554 | 728.6683 |
| SP | SM 33:2;O2            | 2 | [M+HCOOH-H] <sup>-</sup>                | 4  | 731.5375 | 686.5363 |
| GL | DG 42:5               | 2 | [M+Cl] <sup>-</sup>                     | 1  | 733.5537 | 698.5849 |
| —  | <i>nf</i>             | 4 | —                                       | —  | 734.2657 | —        |
| GP | PC O-35:4             | 2 | [M-H-H <sub>2</sub> O] <sup>-</sup>     | 11 | 734.5572 | 753.5672 |
| GP | PA O-38:2             | 2 | [M+Na-2H] <sup>-</sup>                  | 6  | 735.5270 | 714.5563 |
| SP | Cer 44:1;O2           | 2 | [M+CH <sub>3</sub> COOH-H] <sup>-</sup> | 5  | 736.6858 | 677.6686 |
| SP | SM 34:2;O2            | 2 | [M+HCOOH-H] <sup>-</sup>                | 4  | 745.5531 | 700.5519 |
| SP | Cerebroside           | 2 | [M+Na-2H] <sup>-</sup>                  | 2  | 746.5570 | 725.5806 |
| GP | PG O-34:1             | 2 | [M+Na-2H] <sup>-</sup>                  | 10 | 755.5135 | 734.5462 |
| SP | SM 40:1;O2            | 2 | [M-H] <sup>-</sup>                      | 1  | 785.6548 | 786.6615 |
| GP | PA 41:4               | 2 | [M+Na-2H] <sup>-</sup>                  | 0  | 787.5261 | 766.5513 |
| GP | PE 40:7               | 2 | [M-H] <sup>-</sup>                      | 6  | 788.5286 | 789.5309 |
| GP | PA O-42:6             | 2 | [M+Cl] <sup>-</sup>                     | 4  | 797.5229 | 762.5563 |
| SP | SM 41:2;O2            | 2 | [M-H] <sup>-</sup>                      | 1  | 797.6549 | 798.6615 |



|    |                           |   |                                         |   |          |          |
|----|---------------------------|---|-----------------------------------------|---|----------|----------|
| SP | SM 41:1;O2                | 2 | [M-H] <sup>-</sup>                      | 0 | 799.6701 | 800.6771 |
| SP | SM 41:1;O2                | 2 | [M-H] <sup>-</sup>                      | 6 | 800.6729 | 801.6850 |
| GP | PE 42:8                   | 2 | [M-H] <sup>-</sup>                      | 8 | 814.5455 | 815.5465 |
| —  | <i>nf</i>                 | 4 | —                                       | — | 822.8315 | —        |
| SP | SM 41:1;O2                | 2 | [M+HCOOH-H] <sup>-</sup>                | 4 | 845.6788 | 800.6771 |
| SP | SM 41:1;O2                | 2 | [M+HCOOH-H] <sup>-</sup>                | 2 | 846.6819 | 801.6850 |
| ST | VIT D3 deriv <sup>+</sup> | 2 | [2M-H] <sup>-</sup>                     | 4 | 859.6859 | 430.3447 |
| SP | SM 42:1;O2                | 2 | [M+HCOOH-H] <sup>-</sup>                | 4 | 859.6946 | 814.6928 |
| SP | SM 42:1;O2                | 2 | [M+HCOOH-H] <sup>-</sup>                | 1 | 860.6979 | 815.7006 |
| GL | TG 53:7                   | 2 | [M-H] <sup>-</sup>                      | 4 | 861.7015 | 862.7050 |
| GL | TG 52:6                   | 2 | [M+Cl] <sup>-</sup>                     | 1 | 871.6947 | 836.7258 |
| SP | SM 43:2;O2                | 2 | [M+HCOOH-H] <sup>-</sup>                | 2 | 872.6968 | 827.7006 |
| SP | SM 43:1;O2                | 2 | [M+HCOOH-H] <sup>-</sup>                | 3 | 873.7088 | 828.7084 |
| SP | SM 42:1;O2                | 2 | [M+CH <sub>3</sub> COOH-H] <sup>-</sup> | 1 | 874.7135 | 815.7006 |
| GL | TG 54:7                   | 2 | [M-H] <sup>-</sup>                      | 2 | 875.7151 | 876.7207 |
| FA | CAR 18:0;O                | 2 | [2M-H] <sup>-</sup>                     | 4 | 885.7110 | 443.3611 |
| SP | SM 43:2;O2                | 2 | [M+CH <sub>3</sub> COOH-H] <sup>-</sup> | 2 | 886.7129 | 827.7006 |
| SP | SM 44:1;O2                | 2 | [M+HCOOH-H] <sup>-</sup>                | 1 | 888.7296 | 843.7319 |
| GP | PI O-39:2                 | 2 | [M-H] <sup>-</sup>                      | 5 | 889.6218 | 890.6248 |
| GP | PC O-42:7                 | 2 | [M+HCOOH-H] <sup>-</sup>                | 1 | 890.6269 | 845.6298 |
| GP | PC O-42:3                 | 2 | [M+HCOOH-H] <sup>-</sup>                | 3 | 898.6935 | 853.6924 |
| ST | 20:1-Glc-Campesterol      | 2 | [M+HCOOH-H] <sup>-</sup>                | 1 | 899.6976 | 854.7000 |
| GP | PC O-42:2                 | 2 | [M+HCOOH-H] <sup>-</sup>                | 4 | 900.7099 | 855.7081 |
| GP | PS 43:2                   | 2 | [M+HCOOH-H] <sup>-</sup>                | 9 | 930.6524 | 885.6459 |
| FA | CAR 10:2                  | 2 | [3M-H] <sup>-</sup>                     | 2 | 932.6232 | 311.2097 |
| GP | PI O-40:5                 | 2 | [M+CH <sub>3</sub> COOH-H] <sup>-</sup> | 3 | 957.6097 | 898.5935 |
| GP | PI O-42:2                 | 2 | [M+Cl] <sup>-</sup>                     | 3 | 967.6386 | 932.6718 |

|    |                        |   |                           |    |           |          |
|----|------------------------|---|---------------------------|----|-----------|----------|
| GP | PE-NMe2 46:7           | 2 | [M-H+HCOONa] <sup>-</sup> | 8  | 968.6433  | 901.6561 |
| SP | Cerebroside 3-sulphate | 2 | [M-H+HCOONa] <sup>-</sup> | 15 | 984.6292  | 917.6626 |
| GP | LPC 16:1               | 2 | [2M-H] <sup>-</sup>       | 6  | 985.6209  | 493.3168 |
| GP | PC O-16:0              | 2 | [2M+HCOOH-H] <sup>-</sup> | 5  | 1035.6680 | 495.3325 |
| —  | <i>nf</i>              | 4 | —                         | —  | 1036.6720 | —        |
| GP | LPC 16:0               | 2 | [2M+HCOOH-H] <sup>-</sup> | 1  | 1037.6760 | 496.3398 |
| FA | FA 20:4;O4             | 2 | [3M-H] <sup>-</sup>       | 3  | 1103.6560 | 552.3298 |
| —  | <i>nf</i>              | 4 | —                         | —  | 1104.6600 | —        |

[glycan]-Cer, glycosphingolipids; CAR, acyl carnitine; CE, cholesteryl ester; Cer, ceramides; CL, cardiolipin; DG, diradylglycerolipid; FA, fatty acyl; FAHFA, fatty acyl esters of hydroxy fatty acid; GL, glycerolipid; Glc, glucose; GP, glycerophospholipid; HexCer, hexosylceramide; LPA, lysoglycerophosphate; LPC, lysoglycerophosphocholine; LPE, lysoglycerophosphoethanolamine; LPI, lysoglycerophosphoinositol; LPS, lysoglycerophosphoserine; LTC<sub>4</sub>, Leukotriene C<sub>4</sub>; Me, methyl branch; *nf*, not found; PA, glycerophosphate; PC, glycerophosphocholine; PE, glycerophosphoethanolamine; PG, glycerophosphoglycerol; PGP, glycerophosphoglycerophosphates; PI, glycerophosphoinositol; PS, glycerophosphoserine; SM, sphingomyelin; SP, sphingolipid; ST, sterol lipid; TG, triradylglycerolipid.

<sup>†</sup>Level of metabolite identification.

<sup>‡</sup>deriv, derivative.

**Table S7.** Mass spectrometry characterization with theoretical (Th) and experimental (Exp) masses with the  $m/z$  and putative identification for the significant features of the SZ×CT comparison

| Lipid Class | Putative identification          | ID Level <sup>†</sup> | Adduct                                  | Mass Error (ppm) | $m/z$ Exp | $m/z$ Th  |
|-------------|----------------------------------|-----------------------|-----------------------------------------|------------------|-----------|-----------|
| —           | <i>nf</i>                        | 4                     | —                                       | —                | 100.0728  | —         |
| —           | <i>nf</i>                        | 4                     | —                                       | —                | 101.5198  | —         |
| —           | <i>nf</i>                        | 4                     | —                                       | —                | 207.9167  | —         |
| GP          | LPE 18:0                         | 2                     | [M-H] <sup>-</sup>                      | 4                | 480.3114  | 481.3168  |
| ST          | ST 26:1;O5                       | 2                     | [M+HCOOH-H] <sup>-</sup>                | 6                | 481.3145  | 436.3189  |
| GP          | LPS 19:0                         | 2                     | [M-H] <sup>-</sup>                      | 4                | 538.3174  | 539.3223  |
| ST          | ST 18:4;O2                       | 2                     | [2M-H] <sup>-</sup>                     | 8                | 539.3208  | 270.1620  |
| GP          | LPC 16:0                         | 2                     | [M+HCOOH-H] <sup>-</sup>                | 3                | 541.3365  | 496.3398  |
| GP          | LPC O-18:1                       | 2                     | [M+Cl] <sup>-</sup>                     | 2                | 542.3393  | 507.3689  |
| GP          | LPA 24:0                         | 2                     | [M+Na-2H] <sup>-</sup>                  | 2                | 543.3421  | 522.3685  |
| GP          | LPS 21:0                         | 2                     | [M-H] <sup>-</sup>                      | 5                | 566.3490  | 567.3536  |
| GP          | LPC 18:1                         | 2                     | [M+HCOOH-H] <sup>-</sup>                | 3                | 567.3524  | 522.3560  |
| GP          | LPC 22:5                         | 2                     | [M+HCOOH-H] <sup>-</sup>                | 4                | 614.3486  | 569.3481  |
| SP          | Hex(5)-HexNAc(2)-Cer 42:2;O2     | 2                     | [M-3H] <sup>3-</sup>                    | 6                | 620.3373  | 1864.0445 |
| SP          | Hex(3)-HexNAc-KDN(2)-Cer 44:1;O2 | 2                     | [M-3H] <sup>3-</sup>                    | 1                | 621.3399  | 1867.0442 |
| ST          | CE 16:1                          | 2                     | [M+K-2H] <sup>-</sup>                   | 7                | 659.5131  | 622.5689  |
| SP          | SM 32:1;O2                       | 2                     | [M-H] <sup>-</sup>                      | 1                | 673.5293  | 674.5363  |
| GP          | PA O-40:4                        | 2                     | [M-H-H <sub>2</sub> O] <sup>-</sup>     | 1                | 719.5374  | 738.5563  |
| SP          | HexCer 34:1;O2                   | 2                     | [M+Na-2H] <sup>-</sup>                  | 2                | 720.5408  | 699.5649  |
| SP          | SM 32:0;O2                       | 2                     | [M+HCOOH-H] <sup>-</sup>                | 8                | 721.5444  | 331.2643  |
| FA          | FAHFA 24:3-(2-O-24:0)            | 2                     | [M-H] <sup>-</sup>                      | 8                | 727.6554  | 728.6683  |
| SP          | CL 72:0                          | 2                     | [M-2H] <sup>2-</sup>                    | 5                | 731.5375  | 686.5363  |
| —           | <i>nf</i>                        | 4                     | —                                       | —                | 733.5537  | 698.5849  |
| —           | <i>nf</i>                        | 4                     | —                                       | —                | 734.5572  | 753.5672  |
| SP          | Cer 44:1;O2                      | 2                     | [M+CH <sub>3</sub> COOH-H] <sup>-</sup> | 5                | 736.6858  | 677.6686  |

|    |                      |   |                                          |   |           |          |
|----|----------------------|---|------------------------------------------|---|-----------|----------|
| SP | SM 40:1;O2           | 2 | [M-H] <sup>-</sup>                       | 1 | 785.6548  | 786.6615 |
| GP | PE 40:7              | 2 | [M-H] <sup>-</sup>                       | 6 | 788.5286  | 789.5309 |
| SP | SM 40:1;O2           | 2 | [M+HCOOH-H] <sup>-</sup>                 | 5 | 831.6636  | 786.6615 |
| SP | HexCer 42:1;O2       | 2 | [M+Na-2H] <sup>-</sup>                   | 3 | 832.6672  | 811.6901 |
| GL | TG 51:7              | 2 | [M-H] <sup>-</sup>                       | 4 | 833.6697  | 834.6737 |
| SP | SM 41:1;O2           | 2 | [M+HCOOH-H] <sup>-</sup>                 | 4 | 845.6788  | 800.6771 |
| SP | SM 41:1;O2           | 2 | [M+HCOOH-H] <sup>-</sup>                 | 2 | 846.6819  | 801.6850 |
| ST | 18:3-Glc-Campesterol | 2 | [M+HCOOH-H] <sup>-</sup>                 | 6 | 867.6409  | 822.6374 |
| SP | SM 42:1;O2           | 2 | [M+CH <sub>3</sub> COOH-H] <sup>-</sup>  | 3 | 873.7088  | 828.7084 |
| SP | SM 42:1;O2           | 2 | [M+CH <sub>3</sub> COOH-H] <sup>-</sup>  | 1 | 874.7135  | 815.7006 |
| GL | TG 54:7              | 2 | [M-H] <sup>-</sup>                       | 2 | 875.7151  | 876.7207 |
| GP | PI O-39:2            | 2 | [M-H] <sup>-</sup>                       | 5 | 889.6218  | 890.6248 |
| GP | PGP-Me               | 2 | [M-H] <sup>-</sup>                       | 0 | 899.6509  | 900.6584 |
| GP | PE 46:4              | 2 | [M+Na-2H] <sup>-</sup>                   | 9 | 900.6545  | 879.6717 |
| GP | PI O-40:2            | 2 | [M-H] <sup>-</sup>                       | 5 | 903.6377  | 904.6405 |
| GP | PC O-40:4            | 2 | [M-H+CH <sub>3</sub> COONa] <sup>-</sup> | 1 | 904.6418  | 823.6455 |
| GL | TG 54:7              | 2 | [M+K-2H] <sup>-</sup>                    | 3 | 913.6670  | 876.7207 |
| GP | PC 46:7              | 2 | [M-H] <sup>-</sup>                       | 6 | 914.6698  | 915.6717 |
| GP | PS 43:2              | 2 | [M+HCOOH-H] <sup>-</sup>                 | 9 | 930.6524  | 885.6459 |
| GP | PC O-16:0            | 2 | [2M+HCOOH-H] <sup>-</sup>                | 5 | 1035.6680 | 495.3325 |
| —  | <i>nf</i>            | 4 | —                                        | — | 1036.6720 | —        |
| GP | LPC 16:0             | 2 | [2M+HCOOH-H] <sup>-</sup>                | 1 | 1037.6760 | 496.3398 |
| FA | FA 20:4;O4           | 2 | [3M-H] <sup>-</sup>                      | 3 | 1103.6560 | 552.3298 |
| —  | <i>nf</i>            | 4 | —                                        | — | 1104.6600 | —        |

[glycan]-Cer, glycosphingolipids; CE, cholesteryl ester; Cer, ceramides; CL, cardiolipin; FA, fatty acyl; FAHFA, fatty acyl esters of hydroxy fatty acid; GL, glycerolipid; Glc, glucose; GP, glycerophospholipid; HexCer, hexosylceramide; LPA, lysoglycerophosphate; LPC, lysoglycerophosphocholine; LPE, lysoglycerophosphoethanolamine; LPS, lysoglycerophosphoserine; Me, methyl branch; *nf*, not found; PA, glycerophosphate; PC, glycerophosphocholine; PE, glycerophosphoethanolamine; PGP, glycerophosphoglycerophosphates; PI, glycerophosphoinositol; PS, glycerophosphoserine; SM, sphingomyelin; SP, sphingolipid; ST, sterol lipid; TG, triacylglycerolipid.

<sup>†</sup>Level of metabolite identification.

**Table S8.** Mass spectrometry characterization with theoretical (Th) and experimental (Exp) masses with the *m/z* and putative identification for the significant features of the BD×SZ comparison

| Lipid Class | Putative identification    | ID Level <sup>†</sup> | Adduct                                  | Mass Error (ppm) | <i>m/z</i> Exp | <i>m/z</i> Th |
|-------------|----------------------------|-----------------------|-----------------------------------------|------------------|----------------|---------------|
| —           | <i>nf</i>                  | 4                     | —                                       | —                | 101.5198       | —             |
| —           | <i>nf</i>                  | 4                     | —                                       | —                | 207.9167       | —             |
| —           | <i>nf</i>                  | 4                     | —                                       | —                | 214.9244       | —             |
| ST          | ST 29:1;O                  | 2                     | [M+CH <sub>3</sub> COOH-H] <sup>-</sup> | 4                | 473.4018       | 428.4018      |
| SP          | Cer 42:2;O                 | 2                     | [M-H-H <sub>2</sub> O] <sup>-</sup>     | 19               | 612.5961       | 631.6267      |
| SP          | Cer 44:2;O                 | 2                     | [M-H-H <sub>2</sub> O] <sup>-</sup>     | 18               | 640.6277       | 659.6580      |
| SP          | SM 40:1;O <sub>2</sub>     | 2                     | [M-H] <sup>-</sup>                      | 1                | 785.6548       | 786.6615      |
| SP          | SM 41:1;O <sub>2</sub>     | 2                     | [M-H] <sup>-</sup>                      | 0                | 799.6701       | 800.6771      |
| SP          | SM 41:1;O <sub>2</sub>     | 2                     | [M-H] <sup>-</sup>                      | 6                | 800.6729       | 801.6850      |
| SP          | SM 40:1;O <sub>2</sub>     | 2                     | [M+HCOOH-H] <sup>-</sup>                | 5                | 831.6636       | 786.6615      |
| SP          | HexCer 42:1;O <sub>2</sub> | 2                     | [M+Na-2H] <sup>-</sup>                  | 3                | 832.6672       | 811.6901      |
| GL          | TG 51:7                    | 2                     | [M-H] <sup>-</sup>                      | 4                | 833.6697       | 834.6737      |
| SP          | SM 41:1;O <sub>2</sub>     | 2                     | [M+HCOOH-H] <sup>-</sup>                | 4                | 845.6788       | 800.6771      |
| SP          | SM 41:1;O <sub>2</sub>     | 2                     | [M+HCOOH-H] <sup>-</sup>                | 2                | 846.6819       | 801.6850      |
| ST          | VIT D3 deriv <sup>‡</sup>  | 2                     | [2M-H] <sup>-</sup>                     | 4                | 859.6859       | 430.3447      |
| SP          | SM 41:1;O <sub>2</sub>     | 2                     | [M+CH <sub>3</sub> COOH-H] <sup>-</sup> | 1                | 860.6979       | 815.7006      |
| GL          | TG 53:7                    | 2                     | [M-H] <sup>-</sup>                      | 4                | 861.7015       | 862.7050      |
| GP          | PC O-44:3                  | 2                     | [M-H-H <sub>2</sub> O] <sup>-</sup>     | 8                | 862.6984       | 881.7237      |
| SP          | SM 42:1;O <sub>2</sub>     | 2                     | [M+CH <sub>3</sub> COOH-H] <sup>-</sup> | 3                | 873.7088       | 828.7084      |
| SP          | SM 42:1;O <sub>2</sub>     | 2                     | [M+CH <sub>3</sub> COOH-H] <sup>-</sup> | 1                | 874.7135       | 828.7084      |
| GL          | TG 54:7                    | 2                     | [M-H] <sup>-</sup>                      | 2                | 875.7151       | 815.7006      |
| GP          | PC O-44:5                  | 2                     | [M-H] <sup>-</sup>                      | 1                | 876.6858       | 876.7207      |
| GL          | TG 54:7                    | 2                     | [M+K-2H] <sup>-</sup>                   | 3                | 913.6670       | 876.7207      |

|    |                        |   |                           |    |          |          |
|----|------------------------|---|---------------------------|----|----------|----------|
| GP | PC(46:7)               | 2 | [M-H] <sup>-</sup>        | 6  | 914.6698 | 915.6717 |
| —  | <i>nf</i>              | 4 | —                         | —  | 928.6860 | —        |
| FA | CAR 10:2               | 2 | [3M-H] <sup>-</sup>       | 2  | 932.6232 | 311.2097 |
| SP | Cerebroside 3-sulphate | 2 | [M-H+HCOONa] <sup>-</sup> | 15 | 984.6292 | 917.6626 |
| GP | LPC 16:1               | 2 | [2M-H] <sup>-</sup>       | 6  | 985.6209 | 493.3168 |

CAR, acyl carnitine; Cer, ceramides; FA, fatty acyl; GL, glycerolipid; GP, glycerophospholipid; HexCer, hexosylceramide; LPC, lysoglycerophosphocholine; *nf*, not found; PC, glycerophosphocholine; SM, sphingomyelin; SP, sphingolipid; ST, sterol lipid; TG, triradylglycerolipid.

<sup>†</sup>Level of metabolite identification.

<sup>‡</sup>deriv, derivative.

**Tables S9 to S14.** Available as .xls file.
